# Supplementary material for: Antimicrobial Activity and Mode of Action of Celastrol, a Nortriterpen Quinone Isolated from Natural Sources
Source: MDPI journal article supplement (doi:10.3390/foods10030591), 2021-03-11
Supplement: s1 [file s1]

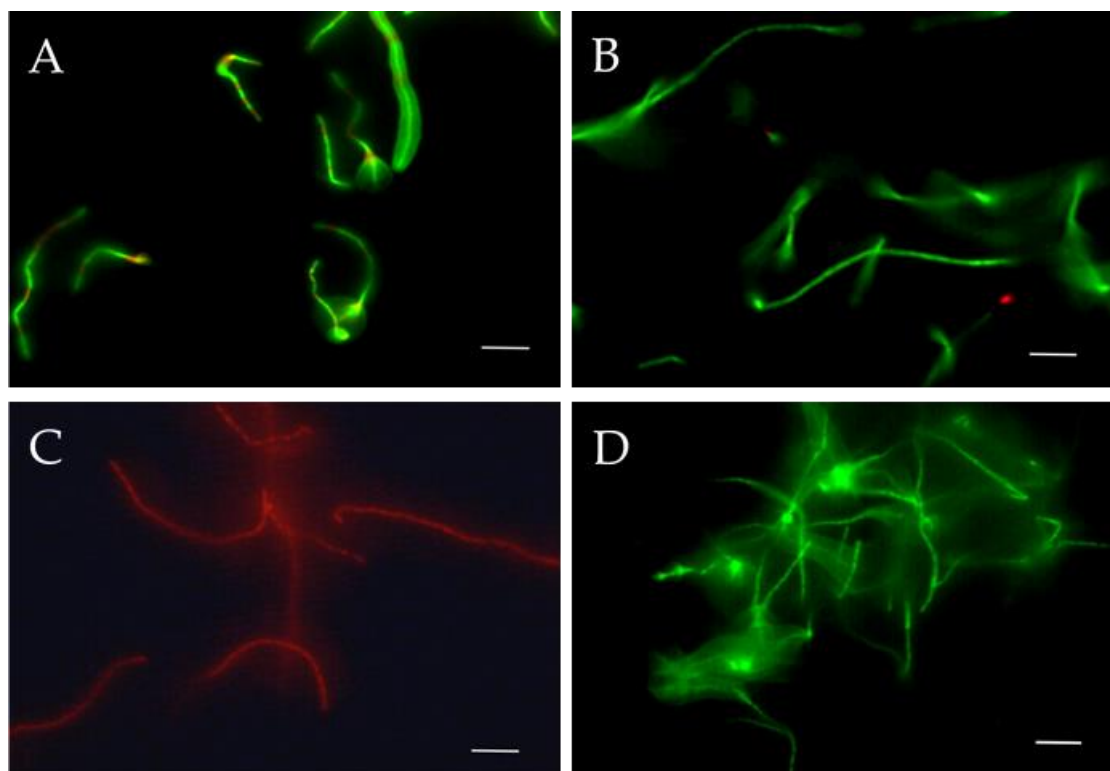

**Figure S1.** Epifluorescence microscopy images of *B. subtilis* stained with propidium iodide and SYTO 9 after treatment with celastrol (3 µg/mL) for 30 and 60 min (A, B) or clofoctol (5 µg/mL) for 30 min (C). Control cells were treated with the maximum proportion of DMSO (D). Scale bars correspond to 10 µm.

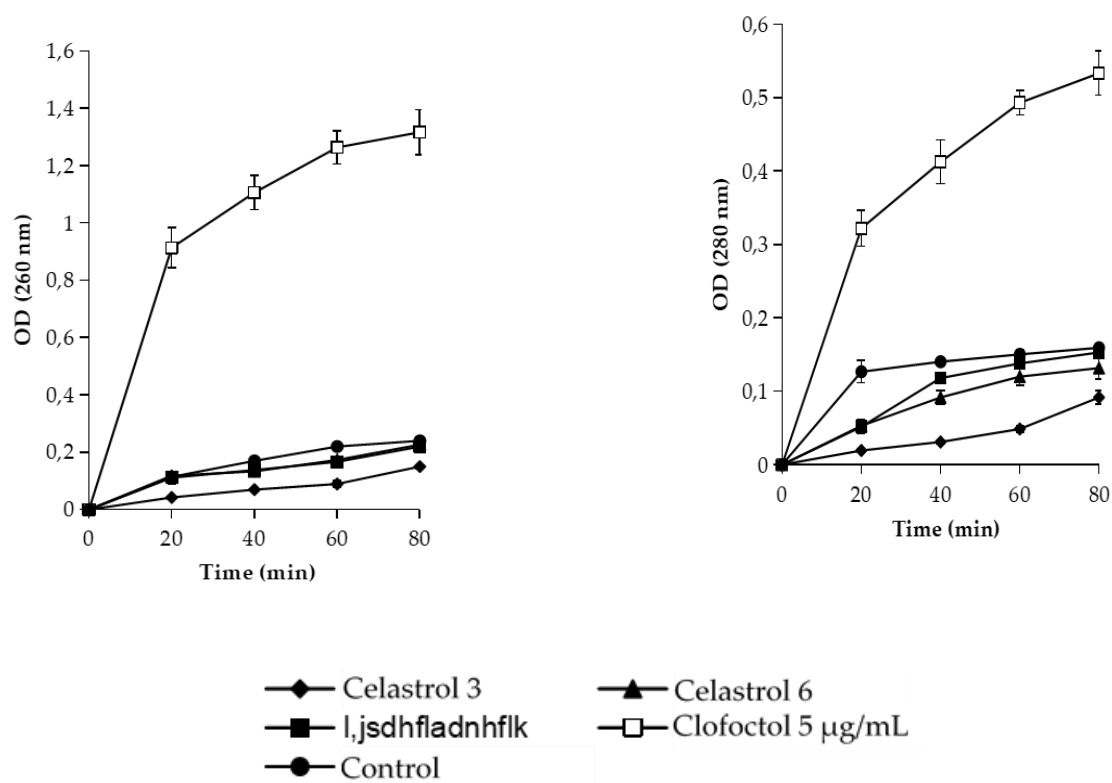

**Figure S2.** Release of 260 and 280 nm absorbing material from *B. subtilis* cells treated with celastrol at 3, 6, and 10 µg/mL and clofoctol at 5 µg/mL. Cells exposed to the maximum proportion of DMSO were used as control. Error bars express SD with n=3.

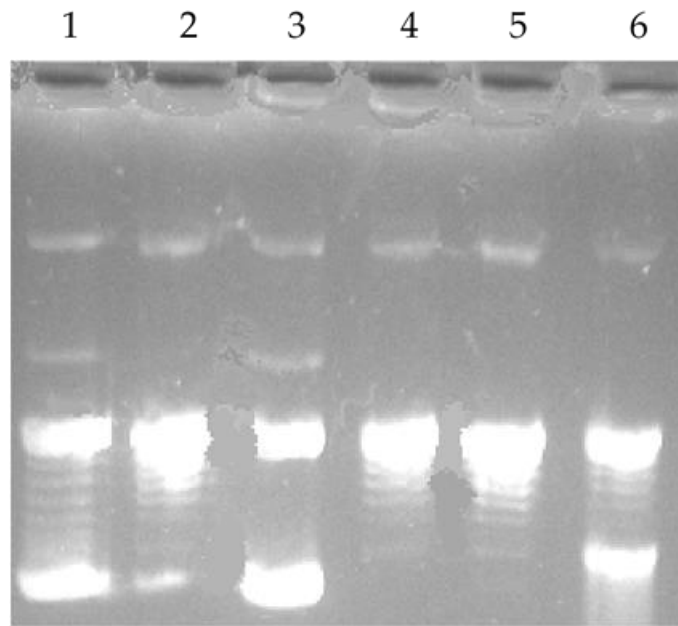

**Figure S3.** DNA supercoiling assays. Electrophoresis gel shows a control with a negatively supercoiled plasmid (Lane 1) with DMSO (line 2), and after its treatment with ciprofloxacin at 25  $\mu\text{g/mL}$  (line 3) and 50  $\mu\text{g/mL}$  (line 4), celastrol at 50  $\mu\text{g/mL}$  (line 5), and pristimerin at 50  $\mu\text{g/mL}$  (line 6).
